# Supplementary material for: An improved U–Pb age dating method for zircon and monazite using 200/266 nm femtosecond laser ablation and enhanced sensitivity multiple-Faraday collector inductively coupled plasma mass spectrometry
Source: Royal Society of Chemistry journal article supplement (doi:10.1039/c4ja00257a), 2014-09-25
Supplement: c4ja00257a1.pdf [file c4ja00257a1.pdf]

ESI Data Table 1: Analytical results for the U-Pb age of zircon crystals

| Date                                                           | Standard | Sample  | Conditions        | No. | <sup>207</sup> Pb/ <sup>235</sup> U | 1SD    | <sup>206</sup> Pb/ <sup>238</sup> U | 1SD    | Error correlation | <sup>207</sup> Pb/ <sup>235</sup> U | 2SD   | <sup>206</sup> Pb/ <sup>238</sup> U | 2SD   | <sup>207</sup> Pb/ <sup>206</sup> Pb | 2SD   |     |
|----------------------------------------------------------------|----------|---------|-------------------|-----|-------------------------------------|--------|-------------------------------------|--------|-------------------|-------------------------------------|-------|-------------------------------------|-------|--------------------------------------|-------|-----|
|                                                                |          |         | Dia./Rep./WL.     |     | Ratio                               |        | Ratio                               |        |                   | Age (Ma)                            |       | Age (Ma)                            |       | Age (Ma)                             |       |     |
| 20140320                                                       | 91500    | TEMORA2 | 50µm/2Hz/266nm    | 1   | 0.5164                              | 0.0137 | 0.0675                              | 0.0014 | 0.7869            | 422.8                               | 27.6  | 421.1                               | 18.1  | 431.7                                | 14.1  |     |
| 20140320                                                       | 91500    | TEMORA2 | 50µm/2Hz/266nm    | 2   | 0.5143                              | 0.0146 | 0.0672                              | 0.0015 | 0.7754            | 421.3                               | 29.4  | 419.1                               | 19.0  | 433.2                                | 15.5  |     |
| 20140320                                                       | 91500    | TEMORA2 | 50µm/2Hz/266nm    | 3   | 0.5196                              | 0.0169 | 0.0680                              | 0.0015 | 0.6583            | 424.9                               | 34.1  | 423.8                               | 18.8  | 430.6                                | 21.1  |     |
| 20140320                                                       | 91500    | TEMORA2 | 50µm/2Hz/266nm    | 4   | 0.4964                              | 0.0163 | 0.0655                              | 0.0016 | 0.7557            | 409.2                               | 32.8  | 409.0                               | 20.9  | 410.7                                | 17.6  |     |
| 20140320                                                       | 91500    | TEMORA2 | 50µm/2Hz/266nm    | 5   | 0.5125                              | 0.0124 | 0.0672                              | 0.0013 | 0.7844            | 420.1                               | 25.0  | 419.2                               | 16.4  | 425.4                                | 12.8  |     |
| 20140403                                                       | 91500    | TEMORA2 | 50µm/2Hz/266nm    | 6   | 0.5069                              | 0.0222 | 0.0663                              | 0.0027 | 0.9218            | 416.4                               | 44.5  | 413.9                               | 34.4  | 429.9                                | 14.6  |     |
| 20140403                                                       | 91500    | TEMORA2 | 50µm/2Hz/266nm    | 7   | 0.5031                              | 0.0222 | 0.0662                              | 0.0028 | 0.9614            | 413.8                               | 44.5  | 413.5                               | 36.1  | 415.4                                | 10.1  |     |
| 20140403                                                       | 91500    | TEMORA2 | 50µm/2Hz/266nm    | 8   | 0.5079                              | 0.0238 | 0.0668                              | 0.0030 | 0.9563            | 417.0                               | 47.8  | 416.7                               | 38.5  | 418.8                                | 11.5  |     |
| 20140403                                                       | 91500    | TEMORA2 | 50µm/2Hz/266nm    | 9   | 0.5096                              | 0.0177 | 0.0664                              | 0.0021 | 0.8937            | 418.2                               | 35.6  | 414.6                               | 26.6  | 437.6                                | 13.6  |     |
| 20140403                                                       | 91500    | TEMORA2 | 50µm/2Hz/266nm    | 10  | 0.5044                              | 0.0183 | 0.0658                              | 0.0021 | 0.8870            | 414.7                               | 36.9  | 410.9                               | 27.3  | 435.8                                | 14.6  |     |
| 20140421                                                       | 91500    | TEMORA2 | 50µm/2Hz/266nm    | 11  | 0.4992                              | 0.0184 | 0.0660                              | 0.0021 | 0.8853            | 411.1                               | 37.0  | 411.8                               | 27.7  | 407.5                                | 14.0  |     |
| 20140421                                                       | 91500    | TEMORA2 | 50µm/2Hz/266nm    | 12  | 0.5083                              | 0.0188 | 0.0666                              | 0.0021 | 0.8527            | 417.3                               | 37.8  | 415.7                               | 27.0  | 426.0                                | 16.4  |     |
| 20140421                                                       | 91500    | TEMORA2 | 50µm/2Hz/266nm    | 13  | 0.5119                              | 0.0218 | 0.0666                              | 0.0022 | 0.7662            | 419.7                               | 43.7  | 415.7                               | 28.0  | 442.0                                | 24.2  |     |
| 20140421                                                       | 91500    | TEMORA2 | 50µm/2Hz/266nm    | 14  | 0.5116                              | 0.0189 | 0.0676                              | 0.0020 | 0.8059            | 419.5                               | 38.0  | 421.4                               | 25.9  | 409.1                                | 17.9  |     |
| 20140421                                                       | 91500    | TEMORA2 | 50µm/2Hz/266nm    | 15  | 0.5120                              | 0.0223 | 0.0673                              | 0.0025 | 0.8585            | 419.8                               | 44.9  | 419.7                               | 32.4  | 420.5                                | 18.8  |     |
| 20140421                                                       | 91500    | TEMORA2 | 50µm/2Hz/266nm    | 16  | 0.5088                              | 0.0176 | 0.0677                              | 0.0020 | 0.8430            | 417.6                               | 35.5  | 422.3                               | 25.5  | 392.0                                | 14.6  |     |
| 20140422                                                       | 91500    | TEMORA2 | 50µm/2Hz/266nm    | 17  | 0.5092                              | 0.0162 | 0.0672                              | 0.0019 | 0.8960            | 417.9                               | 32.6  | 419.5                               | 24.7  | 409.3                                | 11.6  |     |
| 20140422                                                       | 91500    | TEMORA2 | 50µm/2Hz/266nm    | 18  | 0.4802                              | 0.0152 | 0.0634                              | 0.0018 | 0.9125            | 398.2                               | 30.7  | 396.4                               | 23.6  | 409.1                                | 10.6  |     |
| 20140422                                                       | 91500    | TEMORA2 | 50µm/2Hz/266nm    | 19  | 0.4814                              | 0.0141 | 0.0628                              | 0.0013 | 0.7323            | 399.0                               | 28.5  | 392.8                               | 17.4  | 435.2                                | 17.4  |     |
| 20140422                                                       | 91500    | TEMORA2 | 50µm/2Hz/266nm    | 20  | 0.4846                              | 0.0142 | 0.0641                              | 0.0017 | 0.9142            | 401.2                               | 28.7  | 400.3                               | 22.2  | 406.7                                | 9.7   |     |
| 20140422                                                       | 91500    | TEMORA2 | 50µm/2Hz/266nm    | 21  | 0.5257                              | 0.0169 | 0.0684                              | 0.0016 | 0.7318            | 428.9                               | 34.0  | 426.6                               | 20.7  | 441.2                                | 19.3  |     |
| 20140422                                                       | 91500    | TEMORA2 | 50µm/2Hz/266nm    | 22  | 0.5306                              | 0.0178 | 0.0685                              | 0.0019 | 0.8149            | 432.2                               | 35.9  | 427.0                               | 24.2  | 460.1                                | 17.9  |     |
| 20140422                                                       | 91500    | TEMORA2 | 50µm/2Hz/266nm    | 23  | 0.5254                              | 0.0136 | 0.0688                              | 0.0016 | 0.8913            | 428.8                               | 27.4  | 428.7                               | 20.4  | 429.2                                | 10.1  |     |
| 20140422                                                       | 91500    | TEMORA2 | 50µm/2Hz/266nm    | 24  | 0.5158                              | 0.0152 | 0.0680                              | 0.0018 | 0.8966            | 422.4                               | 30.7  | 424.2                               | 23.2  | 412.2                                | 10.8  |     |
| 20140422                                                       | 91500    | TEMORA2 | 50µm/2Hz/266nm    | 25  | 0.5235                              | 0.0172 | 0.0682                              | 0.0019 | 0.8609            | 427.5                               | 34.6  | 425.4                               | 24.8  | 438.6                                | 14.6  |     |
| 20140422                                                       | 91500    | TEMORA2 | 50µm/2Hz/266nm    | 26  | 0.5141                              | 0.0140 | 0.0677                              | 0.0017 | 0.9037            | 421.2                               | 28.2  | 422.2                               | 21.4  | 415.4                                | 9.7   |     |
| 20140422                                                       | 91500    | TEMORA2 | 50µm/2Hz/266nm    | 27  | 0.5212                              | 0.0151 | 0.0682                              | 0.0018 | 0.8899            | 425.9                               | 30.5  | 425.4                               | 22.7  | 428.9                                | 11.4  |     |
| 20140422                                                       | 91500    | TEMORA2 | 50µm/2Hz/266nm    | 28  | 0.5309                              | 0.0133 | 0.0691                              | 0.0014 | 0.8324            | 432.4                               | 26.9  | 430.6                               | 18.6  | 442.2                                | 12.3  |     |
| 20140620                                                       | 91500    | TEMORA2 | 50µm/2Hz/266nm    | 29  | 0.5316                              | 0.0197 | 0.0683                              | 0.0020 | 0.8059            | 432.9                               | 39.6  | 425.8                               | 26.2  | 470.8                                | 20.6  |     |
| 20140620                                                       | 91500    | TEMORA2 | 50µm/2Hz/266nm    | 30  | 0.5103                              | 0.0233 | 0.0674                              | 0.0029 | 0.9535            | 418.6                               | 46.8  | 420.3                               | 37.8  | 409.4                                | 11.3  |     |
| 20140620                                                       | 91500    | TEMORA2 | 50µm/2Hz/266nm    | 31  | 0.5148                              | 0.0167 | 0.0678                              | 0.0020 | 0.9070            | 421.6                               | 33.6  | 422.9                               | 25.7  | 414.5                                | 11.3  |     |
| 20140620                                                       | 91500    | TEMORA2 | 50µm/2Hz/266nm    | 32  | 0.5157                              | 0.0232 | 0.0665                              | 0.0022 | 0.7507            | 422.3                               | 46.5  | 414.9                               | 28.9  | 462.7                                | 27.5  |     |
| 20140620                                                       | 91500    | TEMORA2 | 50µm/2Hz/266nm    | 33  | 0.5194                              | 0.0249 | 0.0671                              | 0.0023 | 0.7077            | 424.8                               | 49.9  | 418.7                               | 29.3  | 458.0                                | 31.0  |     |
| 20140620                                                       | 91500    | TEMORA2 | 50µm/2Hz/266nm    | 34  | 0.5045                              | 0.0166 | 0.0655                              | 0.0017 | 0.7732            | 414.7                               | 33.5  | 409.0                               | 21.5  | 446.6                                | 18.7  |     |
| 20140620                                                       | 91500    | TEMORA2 | 50µm/2Hz/266nm    | 35  | 0.4947                              | 0.0190 | 0.0641                              | 0.0021 | 0.8486            | 408.1                               | 38.2  | 400.3                               | 26.9  | 452.5                                | 18.4  |     |
| 20140620                                                       | 91500    | TEMORA2 | 50µm/2Hz/266nm    | 36  | -                                   | -      | -                                   | -      | -                 | -                                   | -     | -                                   | -     | -                                    | -     |     |
| 20140620                                                       | 91500    | TEMORA2 | 50µm/2Hz/266nm    | 37  | 0.5024                              | 0.0193 | 0.0654                              | 0.0018 | 0.7349            | 413.3                               | 38.8  | 408.5                               | 23.7  | 440.3                                | 22.9  |     |
| 20140620                                                       | 91500    | TEMORA2 | 50µm/2Hz/266nm    | 38  | 0.5020                              | 0.0179 | 0.0660                              | 0.0021 | 0.9067            | 413.1                               | 36.1  | 411.8                               | 27.5  | 420.2                                | 12.7  |     |
| Reference age: 416.78 ± 0.33 Ma (ID-TIMS), Black et al. (2004) |          |         |                   |     |                                     |        |                                     |        |                   | Weighted mean =                     | 418.7 | 5.6                                 | 417.0 | 3.9                                  | 423.5 | 2.3 |
| 20140620                                                       | 91500    | TEMORA2 | 30µm/10Hz/266nm   | 1   | 0.5183                              | 0.0235 | 0.0682                              | 0.0027 | 0.8801            | 424.0                               | 47.3  | 425.0                               | 35.1  | 418.3                                | 18.0  |     |
| 20140620                                                       | 91500    | TEMORA2 | 30µm/10Hz/266nm   | 2   | 0.5027                              | 0.0213 | 0.0662                              | 0.0023 | 0.8219            | 413.5                               | 42.7  | 413.2                               | 29.6  | 415.3                                | 20.0  |     |
| 20140620                                                       | 91500    | TEMORA2 | 30µm/10Hz/266nm   | 3   | 0.5117                              | 0.0225 | 0.0669                              | 0.0025 | 0.8624            | 419.6                               | 45.2  | 417.3                               | 32.7  | 432.2                                | 19.2  |     |
| 20140620                                                       | 91500    | TEMORA2 | 30µm/10Hz/266nm   | 4   | 0.5227                              | 0.0227 | 0.0683                              | 0.0026 | 0.8774            | 427.0                               | 45.7  | 426.1                               | 33.6  | 431.8                                | 18.0  |     |
| 20140620                                                       | 91500    | TEMORA2 | 30µm/10Hz/266nm   | 5   | 0.5210                              | 0.0283 | 0.0684                              | 0.0034 | 0.9028            | 425.9                               | 56.7  | 426.5                               | 43.2  | 422.2                                | 19.7  |     |
| 20140620                                                       | 91500    | TEMORA2 | 30µm/10Hz/266nm   | 6   | 0.5059                              | 0.0239 | 0.0665                              | 0.0028 | 0.8927            | 415.7                               | 48.1  | 415.1                               | 36.2  | 418.9                                | 17.9  |     |
| 20140620                                                       | 91500    | TEMORA2 | 30µm/10Hz/266nm   | 7   | 0.5079                              | 0.0256 | 0.0664                              | 0.0027 | 0.7956            | 417.1                               | 51.3  | 414.2                               | 34.3  | 433.0                                | 26.4  |     |
| 20140620                                                       | 91500    | TEMORA2 | 30µm/10Hz/266nm   | 8   | 0.5129                              | 0.0227 | 0.0671                              | 0.0024 | 0.8017            | 420.4                               | 45.6  | 418.7                               | 30.7  | 429.4                                | 22.7  |     |
| 20140620                                                       | 91500    | TEMORA2 | 30µm/10Hz/266nm   | 9   | 0.5138                              | 0.0243 | 0.0669                              | 0.0025 | 0.8044            | 421.0                               | 48.8  | 417.2                               | 32.8  | 442.1                                | 24.9  |     |
| 20140620                                                       | 91500    | TEMORA2 | 30µm/10Hz/266nm   | 10  | 0.5186                              | 0.0266 | 0.0674                              | 0.0029 | 0.8425            | 424.2                               | 53.3  | 420.3                               | 37.4  | 445.6                                | 24.6  |     |
| 20140630                                                       | 91500    | TEMORA2 | 30µm/10Hz/266nm   | 11  | 0.4829                              | 0.0280 | 0.0634                              | 0.0033 | 0.9049            | 400.1                               | 56.1  | 396.5                               | 42.8  | 420.6                                | 20.8  |     |
| 20140630                                                       | 91500    | TEMORA2 | 30µm/10Hz/266nm   | 12  | -                                   | -      | -                                   | -      | -                 | -                                   | -     | -                                   | -     | -                                    | -     |     |
| 20140630                                                       | 91500    | TEMORA2 | 30µm/10Hz/266nm   | 13  | 0.5230                              | 0.0294 | 0.0686                              | 0.0035 | 0.9052            | 427.2                               | 58.8  | 427.9                               | 44.9  | 423.3                                | 20.2  |     |
| 20140630                                                       | 91500    | TEMORA2 | 30µm/10Hz/266nm   | 14  | 0.5168                              | 0.0311 | 0.0681                              | 0.0039 | 0.9519            | 423.0                               | 62.3  | 424.5                               | 50.3  | 414.7                                | 15.3  |     |
| 20140630                                                       | 91500    | TEMORA2 | 30µm/10Hz/266nm   | 15  | 0.5079                              | 0.0260 | 0.0664                              | 0.0030 | 0.8689            | 417.0                               | 52.1  | 414.2                               | 38.0  | 432.6                                | 21.9  |     |
| 20140630                                                       | 91500    | TEMORA2 | 30µm/10Hz/266nm   | 16  | -                                   | -      | -                                   | -      | -                 | -                                   | -     | -                                   | -     | -                                    | -     |     |
| 20140630                                                       | 91500    | TEMORA2 | 30µm/10Hz/266nm   | 17  | 0.5233                              | 0.0287 | 0.0689                              | 0.0033 | 0.8792            | 427.4                               | 57.5  | 429.6                               | 42.8  | 415.0                                | 21.7  |     |
| 20140630                                                       | 91500    | TEMORA2 | 30µm/10Hz/266nm   | 18  | 0.5114                              | 0.0189 | 0.0671                              | 0.0023 | 0.9300            | 419.4                               | 38.0  | 419.0                               | 29.7  | 421.8                                | 11.4  |     |
| 20140630                                                       | 91500    | TEMORA2 | 30µm/10Hz/266nm   | 19  | 0.5123                              | 0.0284 | 0.0668                              | 0.0032 | 0.8529            | 420.0                               | 56.9  | 416.9                               | 40.7  | 437.3                                | 25.3  |     |
| 20140630                                                       | 91500    | TEMORA2 | 30µm/10Hz/266nm   | 20  | 0.5124                              | 0.0257 | 0.0668                              | 0.0030 | 0.8893            | 420.0                               | 51.4  | 416.8                               | 38.3  | 437.6                                | 20.0  |     |
| Reference age: 416.78 ± 0.33 Ma (ID-TIMS), Black et al. (2004) |          |         |                   |     |                                     |        |                                     |        |                   | Weighted mean =                     | 420.0 | 11.7                                | 418.5 | 8.5                                  | 425.4 | 4.5 |
| 20140708                                                       | 91500    | TEMORA2 | 30µmRR/25Hz/200nn | 1   | 0.5090                              | 0.0176 | 0.0670                              | 0.0019 | 0.8305            | 417.8                               | 35.5  | 418.3                               | 24.8  | 414.8                                | 16.0  |     |
| 20140708                                                       | 91500    | TEMORA2 | 30µmRR/25Hz/200nn | 2   | 0.5144                              | 0.0174 | 0.0675                              | 0.0018 | 0.7749            | 421.4                               | 35.0  | 421.0                               | 22.8  | 423.4                                | 18.1  |     |
| 20140708                                                       | 91500    | TEMORA2 | 30µmRR/25Hz/200nn | 3   | 0.5103                              | 0.0164 | 0.0670                              | 0.0018 | 0.8415            | 418.6                               | 33.0  | 418.0                               | 23.3  | 421.9                                | 14.6  |     |
| 20140708                                                       | 91500    | TEMORA2 | 30µmRR/25Hz/200nn | 4   | 0.5133                              | 0.0166 | 0.0670                              | 0.0015 | 0.7151            | 420.7                               | 33.5  | 417.8                               | 20.0  | 436.4                                | 19.7  |     |
| 20140708                                                       | 91500    | TEMORA2 | 30µmRR/25Hz/200nn | 5   | 0.5155                              | 0.0249 | 0.0670                              | 0.0018 | 0.5473            | 422.2                               | 50.0  | 418.0                               | 22.8  | 445.2                                | 36.0  |     |
| 20140708                                                       | 91500    | TEMORA2 | 30µmRR/25Hz/200nn | 6   | 0.5119                              | 0.0186 | 0.0668                              | 0.0016 | 0.6502            | 419.8                               | 37.4  | 416.6                               | 20.3  | 436.9                                | 24.1  |     |
| 20140708                                                       | 91500    | TEMORA2 | 30µmRR/25Hz/200nn | 7   | 0.5083                              | 0.0180 | 0.0664                              | 0.0018 | 0.7441            | 417.3                               | 36.3  | 414.7                               | 22.6  | 432.0                                | 20.5  |     |
| 20140708                                                       | 91500    | TEMORA2 | 30µmRR/25Hz/200nn | 8   | 0.5084                              | 0.0201 | 0.0669                              | 0.0018 | 0.6802            | 417.4                               | 40.5  | 417.4                               | 23.2  | 417.1                                | 24.2  |     |
| 20140708                                                       | 91500    | TEMORA2 | 30µmRR/25Hz/200nn | 9   | 0.5061                              | 0.0180 | 0.0662                              | 0.0015 | 0.6529            | 415.8                               | 36.3  | 412.9                               | 19.8  | 431.8                                | 23.3  |     |
| 20140708                                                       | 91500    | TEMORA2 | 30µmRR/25Hz/200nn | 10  | 0.5209                              | 0.0174 | 0.0682                              | 0.0015 | 0.6718            | 425.7                               | 35.0  | 425.4                               | 19.7  | 427.8                                | 21.1  |     |
| 20140708                                                       | 91500    | TEMORA2 | 30µmRR/25Hz/200nn | 11  | 0.5083                              | 0.0202 | 0.0665                              | 0.0014 | 0.5127            | 417.3                               |       |                                     |       |                                      |       |     |

ESI Table 1. continue

| Date                                                                                | Standard | Sample    | Conditions        | No. | <sup>207</sup> Pb/ <sup>235</sup> U | 1SD    | <sup>206</sup> Pb/ <sup>238</sup> U | 1SD    | Error correlation | <sup>207</sup> Pb/ <sup>235</sup> U | 2SD   | <sup>206</sup> Pb/ <sup>238</sup> U | 2SD   | <sup>207</sup> Pb/ <sup>206</sup> Pb | 2SD   |      |
|-------------------------------------------------------------------------------------|----------|-----------|-------------------|-----|-------------------------------------|--------|-------------------------------------|--------|-------------------|-------------------------------------|-------|-------------------------------------|-------|--------------------------------------|-------|------|
|                                                                                     |          |           | Dia./Rep./WL.     |     | Ratio                               |        | Ratio                               |        |                   | Age (Ma)                            |       | Age (Ma)                            |       | Age (Ma)                             |       |      |
| 20140711                                                                            | 91500    | Prešovice | 30µmRR/25Hz/200nn | 6   | 0.3918                              | 0.0128 | 0.0536                              | 0.0015 | 0.8581            | 335.7                               | 25.8  | 336.6                               | 19.4  | 328.9                                | 11.0  |      |
| 20140711                                                                            | 91500    | Prešovice | 30µmRR/25Hz/200nn | 7   | 0.3884                              | 0.0130 | 0.0533                              | 0.0016 | 0.8822            | 333.2                               | 26.2  | 334.8                               | 20.3  | 322.1                                | 10.2  |      |
| 20140711                                                                            | 91500    | Prešovice | 30µmRR/25Hz/200nn | 8   | 0.3882                              | 0.0113 | 0.0532                              | 0.0014 | 0.8851            | 333.1                               | 22.9  | 334.4                               | 17.7  | 323.8                                | 8.8   |      |
| 20140711                                                                            | 91500    | Prešovice | 30µmRR/25Hz/200nn | 9   | 0.3903                              | 0.0116 | 0.0533                              | 0.0014 | 0.8917            | 334.6                               | 23.4  | 334.5                               | 18.2  | 335.0                                | 9.0   |      |
| 20140711                                                                            | 91500    | Prešovice | 30µmRR/25Hz/200nn | 10  | 0.3873                              | 0.0112 | 0.0530                              | 0.0014 | 0.9063            | 332.4                               | 22.6  | 332.9                               | 17.9  | 328.7                                | 8.0   |      |
| 20140711                                                                            | 91500    | Prešovice | 30µmRR/25Hz/200nn | 11  | 0.3883                              | 0.0107 | 0.0532                              | 0.0014 | 0.9213            | 333.2                               | 21.7  | 334.2                               | 17.4  | 325.9                                | 7.0   |      |
| 20140711                                                                            | 91500    | Prešovice | 30µmRR/25Hz/200nn | 12  | 0.3898                              | 0.0124 | 0.0533                              | 0.0016 | 0.9233            | 334.2                               | 25.0  | 334.5                               | 20.1  | 332.5                                | 8.1   |      |
| 20140711                                                                            | 91500    | Prešovice | 30µmRR/25Hz/200nn | 13  | 0.3890                              | 0.0117 | 0.0532                              | 0.0015 | 0.9074            | 333.6                               | 23.6  | 334.3                               | 18.7  | 329.0                                | 8.3   |      |
| 20140711                                                                            | 91500    | Prešovice | 30µmRR/25Hz/200nn | 14  | 0.3903                              | 0.0151 | 0.0534                              | 0.0019 | 0.9351            | 334.6                               | 30.4  | 335.1                               | 24.8  | 331.0                                | 9.1   |      |
| 20140711                                                                            | 91500    | Prešovice | 30µmRR/25Hz/200nn | 15  | 0.3913                              | 0.0086 | 0.0535                              | 0.0010 | 0.8606            | 335.3                               | 17.5  | 335.8                               | 13.1  | 331.7                                | 7.5   |      |
| 20140711                                                                            | 91500    | Prešovice | 30µmRR/25Hz/200nn | 16  | 0.3883                              | 0.0107 | 0.0531                              | 0.0013 | 0.9075            | 333.2                               | 21.6  | 333.6                               | 17.1  | 330.1                                | 7.7   |      |
| 20140711                                                                            | 91500    | Prešovice | 30µmRR/25Hz/200nn | 17  | 0.3921                              | 0.0113 | 0.0535                              | 0.0014 | 0.9166            | 335.9                               | 22.8  | 336.1                               | 18.2  | 334.7                                | 7.7   |      |
| 20140711                                                                            | 91500    | Prešovice | 30µmRR/25Hz/200nn | 18  | 0.3906                              | 0.0116 | 0.0534                              | 0.0015 | 0.9224            | 334.8                               | 23.5  | 335.6                               | 18.9  | 329.1                                | 7.6   |      |
| 20140711                                                                            | 91500    | Prešovice | 30µmRR/25Hz/200nn | 19  | 0.3926                              | 0.0133 | 0.0537                              | 0.0017 | 0.9205            | 336.3                               | 26.8  | 336.9                               | 21.5  | 331.7                                | 8.8   |      |
| 20140711                                                                            | 91500    | Prešovice | 30µmRR/25Hz/200nn | 20  | 0.3912                              | 0.0097 | 0.0534                              | 0.0012 | 0.8700            | 335.3                               | 19.6  | 335.1                               | 14.8  | 336.1                                | 8.2   |      |
| 20140711                                                                            | 91500    | Prešovice | 30µmRR/25Hz/200nn | 21  | 0.3913                              | 0.0096 | 0.0535                              | 0.0011 | 0.8641            | 335.3                               | 19.3  | 335.7                               | 14.5  | 332.4                                | 8.2   |      |
| 20140711                                                                            | 91500    | Prešovice | 30µmRR/25Hz/200nn | 22  | 0.3884                              | 0.0108 | 0.0531                              | 0.0013 | 0.9005            | 333.2                               | 21.8  | 333.3                               | 17.1  | 332.7                                | 8.0   |      |
| 20140711                                                                            | 91500    | Prešovice | 30µmRR/25Hz/200nn | 23  | 0.3888                              | 0.0093 | 0.0532                              | 0.0011 | 0.8713            | 333.5                               | 18.7  | 334.2                               | 14.2  | 328.4                                | 7.7   |      |
| 20140711                                                                            | 91500    | Prešovice | 30µmRR/25Hz/200nn | 24  | 0.3900                              | 0.0139 | 0.0533                              | 0.0018 | 0.9477            | 334.4                               | 28.1  | 334.7                               | 23.3  | 332.0                                | 7.6   |      |
| 20140711                                                                            | 91500    | Prešovice | 30µmRR/25Hz/200nn | 25  | 0.3915                              | 0.0111 | 0.0533                              | 0.0014 | 0.9333            | 335.4                               | 22.4  | 334.8                               | 18.2  | 339.8                                | 6.9   |      |
| 20140711                                                                            | 91500    | Prešovice | 30µmRR/25Hz/200nn | 26  | 0.3921                              | 0.0105 | 0.0531                              | 0.0012 | 0.8750            | 335.9                               | 21.2  | 333.6                               | 16.1  | 351.8                                | 9.1   |      |
| 20140711                                                                            | 91500    | Prešovice | 30µmRR/25Hz/200nn | 27  | 0.3948                              | 0.0102 | 0.0532                              | 0.0012 | 0.8907            | 337.9                               | 20.5  | 334.3                               | 15.7  | 362.2                                | 8.5   |      |
| 20140711                                                                            | 91500    | Prešovice | 30µmRR/25Hz/200nn | 28  | 0.3908                              | 0.0092 | 0.0534                              | 0.0011 | 0.8870            | 334.9                               | 18.6  | 335.5                               | 14.4  | 331.1                                | 7.2   |      |
| 20140711                                                                            | 91500    | Prešovice | 30µmRR/25Hz/200nn | 29  | 0.3914                              | 0.0091 | 0.0534                              | 0.0011 | 0.9040            | 335.4                               | 18.4  | 335.5                               | 14.5  | 334.7                                | 6.7   |      |
| 20140711                                                                            | 91500    | Prešovice | 30µmRR/25Hz/200nn | 30  | 0.3907                              | 0.0092 | 0.0534                              | 0.0011 | 0.8880            | 334.8                               | 18.7  | 335.4                               | 14.5  | 330.8                                | 7.2   |      |
| Reference age: 337.13 ± 0.37 Ma (ID-TIMS), Black et al. (2005)                      |          |           |                   |     |                                     |        |                                     |        |                   | Weighted mean =                     | 334.5 | 4.1                                 | 334.7 | 3.2                                  | 333.1 | 1.5  |
| 20140421                                                                            | 91500    | OD3       | 50µm/4Hz/266nm    | 1   | 0.0398                              | 0.0048 | 0.0051                              | 0.0001 | 0.2048            | 39.6                                | 9.7   | 32.8                                | 1.6   | 472.8                                | 111.6 |      |
| 20140421                                                                            | 91500    | OD3       | 50µm/4Hz/266nm    | 2   | 0.0412                              | 0.0062 | 0.0051                              | 0.0001 | 0.1649            | 41.0                                | 12.5  | 32.8                                | 1.6   | 549.3                                | 162.7 |      |
| 20140421                                                                            | 91500    | OD3       | 50µm/4Hz/266nm    | 3   | 0.0406                              | 0.0060 | 0.0052                              | 0.0001 | 0.1665            | 40.4                                | 12.1  | 33.4                                | 1.6   | 480.2                                | 139.1 |      |
| 20140421                                                                            | 91500    | OD3       | 50µm/4Hz/266nm    | 4   | -                                   | -      | -                                   | -      | -                 | -                                   | -     | -                                   | -     | -                                    | -     |      |
| 20140421                                                                            | 91500    | OD3       | 50µm/4Hz/266nm    | 5   | 0.0413                              | 0.0058 | 0.0052                              | 0.0002 | 0.2378            | 41.1                                | 11.8  | 33.2                                | 2.2   | 528.9                                | 145.1 |      |
| 20140421                                                                            | 91500    | OD3       | 50µm/4Hz/266nm    | 6   | 0.0386                              | 0.0061 | 0.0052                              | 0.0001 | 0.1260            | 38.4                                | 12.3  | 33.1                                | 1.3   | 381.5                                | 119.0 |      |
| 20140421                                                                            | 91500    | OD3       | 50µm/4Hz/266nm    | 7   | 0.0387                              | 0.0041 | 0.0053                              | 0.0002 | 0.3178            | 38.6                                | 8.3   | 33.9                                | 2.3   | 341.7                                | 68.9  |      |
| 20140421                                                                            | 91500    | OD3       | 50µm/4Hz/266nm    | 8   | 0.0386                              | 0.0042 | 0.0052                              | 0.0001 | 0.2221            | 38.5                                | 8.4   | 33.6                                | 1.6   | 353.9                                | 74.4  |      |
| 20140421                                                                            | 91500    | OD3       | 50µm/4Hz/266nm    | 9   | 0.0379                              | 0.0062 | 0.0052                              | 0.0001 | 0.1443            | 37.7                                | 12.6  | 33.3                                | 1.6   | 331.2                                | 107.8 |      |
| 20140421                                                                            | 91500    | OD3       | 50µm/4Hz/266nm    | 10  | 0.0369                              | 0.0037 | 0.0052                              | 0.0001 | 0.1870            | 36.8                                | 7.6   | 33.6                                | 1.3   | 249.0                                | 49.4  |      |
| 20140421                                                                            | 91500    | OD3       | 50µm/4Hz/266nm    | 11  | 0.0377                              | 0.0025 | 0.0051                              | 0.0001 | 0.3421            | 37.6                                | 5.1   | 33.1                                | 1.5   | 336.2                                | 42.5  |      |
| 20140421                                                                            | 91500    | OD3       | 50µm/4Hz/266nm    | 12  | 0.0357                              | 0.0020 | 0.0051                              | 0.0001 | 0.3959            | 35.7                                | 4.1   | 33.0                                | 1.5   | 217.6                                | 22.5  |      |
| 20140421                                                                            | 91500    | OD3       | 50µm/4Hz/266nm    | 13  | 0.0426                              | 0.0075 | 0.0052                              | 0.0001 | 0.1594            | 42.3                                | 15.1  | 33.5                                | 1.9   | 575.6                                | 198.9 |      |
| 20140421                                                                            | 91500    | OD3       | 50µm/4Hz/266nm    | 14  | 0.0385                              | 0.0049 | 0.0052                              | 0.0001 | 0.1576            | 38.4                                | 10.0  | 33.6                                | 1.4   | 346.2                                | 87.4  |      |
| 20140421                                                                            | 91500    | OD3       | 50µm/4Hz/266nm    | 15  | 0.0404                              | 0.0050 | 0.0052                              | 0.0001 | 0.2101            | 40.2                                | 10.1  | 33.6                                | 1.7   | 452.4                                | 109.1 |      |
| 20140630                                                                            | 91500    | OD3       | 50µm/4Hz/266nm    | 16  | -                                   | -      | -                                   | -      | -                 | -                                   | -     | -                                   | -     | -                                    | -     |      |
| 20140630                                                                            | 91500    | OD3       | 50µm/4Hz/266nm    | 17  | 0.0383                              | 0.0031 | 0.0051                              | 0.0002 | 0.4481            | 38.1                                | 6.2   | 32.8                                | 2.4   | 386.2                                | 55.1  |      |
| 20140630                                                                            | 91500    | OD3       | 50µm/4Hz/266nm    | 18  | 0.0430                              | 0.0055 | 0.0053                              | 0.0003 | 0.4790            | 42.8                                | 11.1  | 34.3                                | 4.2   | 548.9                                | 122.2 |      |
| 20140630                                                                            | 91500    | OD3       | 50µm/4Hz/266nm    | 19  | 0.0420                              | 0.0040 | 0.0051                              | 0.0002 | 0.3621            | 41.8                                | 8.1   | 32.7                                | 2.3   | 597.8                                | 106.1 |      |
| 20140630                                                                            | 91500    | OD3       | 50µm/4Hz/266nm    | 20  | 0.0407                              | 0.0038 | 0.0052                              | 0.0002 | 0.4388            | 40.5                                | 7.8   | 33.5                                | 2.8   | 477.7                                | 81.0  |      |
| 20140630                                                                            | 91500    | OD3       | 50µm/4Hz/266nm    | 21  | 0.0417                              | 0.0034 | 0.0052                              | 0.0002 | 0.5260            | 41.5                                | 6.9   | 33.3                                | 2.8   | 546.3                                | 75.3  |      |
| 20140630                                                                            | 91500    | OD3       | 50µm/4Hz/266nm    | 22  | 0.0409                              | 0.0044 | 0.0052                              | 0.0002 | 0.3019            | 40.7                                | 9.0   | 33.8                                | 2.2   | 474.1                                | 97.7  |      |
| 20140630                                                                            | 91500    | OD3       | 50µm/4Hz/266nm    | 23  | 0.0421                              | 0.0053 | 0.0052                              | 0.0002 | 0.3274            | 41.8                                | 10.8  | 33.6                                | 2.8   | 541.5                                | 129.7 |      |
| 20140630                                                                            | 91500    | OD3       | 50µm/4Hz/266nm    | 24  | 0.0390                              | 0.0051 | 0.0051                              | 0.0002 | 0.3117            | 38.9                                | 10.2  | 33.0                                | 2.7   | 413.9                                | 101.9 |      |
| 20140630                                                                            | 91500    | OD3       | 50µm/4Hz/266nm    | 25  | 0.0422                              | 0.0061 | 0.0053                              | 0.0003 | 0.3633            | 42.0                                | 12.4  | 33.9                                | 3.6   | 531.0                                | 143.2 |      |
| Reference age: 33.0 ± 0.1 Ma (average of SHRIMP and LA-ICP-MS); Iwano et al. (2013) |          |           |                   |     |                                     |        |                                     |        |                   | Weighted mean =                     | 38.9  | 1.7                                 | 33.3  | 0.4                                  | 345.1 | 14.0 |
| 20140711                                                                            | 91500    | Prešovice | 30µmRR/25Hz/200nn | 1   | 0.0362                              | 0.0089 | 0.0052                              | 0.0002 | 0.1270            | 36.1                                | 18.1  | 33.1                                | 2.1   | 237.0                                | 116.2 |      |
| 20140711                                                                            | 91500    | Prešovice | 30µmRR/25Hz/200nn | 2   | 0.0337                              | 0.0062 | 0.0051                              | 0.0001 | 0.1568            | 33.6                                | 12.6  | 33.1                                | 1.9   | 70.8                                 | 25.8  |      |
| 20140711                                                                            | 91500    | Prešovice | 30µmRR/25Hz/200nn | 3   | 0.0353                              | 0.0063 | 0.0051                              | 0.0001 | 0.1387            | 35.2                                | 12.8  | 33.0                                | 1.7   | 188.1                                | 66.9  |      |
| 20140711                                                                            | 91500    | Prešovice | 30µmRR/25Hz/200nn | 4   | 0.0342                              | 0.0041 | 0.0051                              | 0.0001 | 0.2414            | 34.2                                | 8.4   | 32.8                                | 1.9   | 132.0                                | 30.9  |      |
| 20140711                                                                            | 91500    | Prešovice | 30µmRR/25Hz/200nn | 5   | 0.0331                              | 0.0043 | 0.0051                              | 0.0001 | 0.1931            | 33.1                                | 8.7   | 32.9                                | 1.7   | 46.7                                 | 11.9  |      |
| 20140711                                                                            | 91500    | Prešovice | 30µmRR/25Hz/200nn | 6   | 0.0345                              | 0.0036 | 0.0051                              | 0.0001 | 0.2768            | 34.4                                | 7.2   | 33.0                                | 1.9   | 136.6                                | 27.1  |      |
| 20140711                                                                            | 91500    | Prešovice | 30µmRR/25Hz/200nn | 7   | 0.0343                              | 0.0028 | 0.0051                              | 0.0001 | 0.3174            | 34.3                                | 5.7   | 33.0                                | 1.7   | 126.5                                | 19.8  |      |
| 20140711                                                                            | 91500    | Prešovice | 30µmRR/25Hz/200nn | 8   | 0.0338                              | 0.0026 | 0.0051                              | 0.0001 | 0.3450            | 33.8                                | 5.2   | 32.7                                | 1.7   | 112.4                                | 16.0  |      |
| 20140711                                                                            | 91500    | Prešovice | 30µmRR/25Hz/200nn | 9   | 0.0339                              | 0.0027 | 0.0051                              | 0.0001 | 0.3451            | 33.9                                | 5.5   | 32.7                                | 1.8   | 115.8                                | 17.3  |      |
| 20140711                                                                            | 91500    | Prešovice | 30µmRR/25Hz/200nn | 10  | 0.0342                              | 0.0024 | 0.0051                              | 0.0001 | 0.3377            | 34.1                                | 4.9   | 32.9                                | 1.6   | 116.8                                | 15.6  |      |
| 20140711                                                                            | 91500    | Prešovice | 30µmRR/25Hz/200nn | 11  | 0.0352                              | 0.0031 | 0.0051                              | 0.0001 | 0.2148            | 35.1                                | 6.3   | 32.9                                | 1.2   | 190.7                                | 32.9  |      |
| 20140711                                                                            | 91500    | Prešovice | 30µmRR/25Hz/200nn | 12  | 0.0344                              | 0.0055 | 0.0051                              | 0.0001 | 0.1445            | 34.3                                | 11.2  | 32.8                                | 1.5   | 146.4                                | 46.5  |      |
| 20140711                                                                            | 91500    | Prešovice | 30µmRR/25Hz/200nn | 13  | 0.0336                              | 0.0062 | 0.0051                              | 0.0001 | 0.1222            | 33.5                                | 12.5  | 32.8                                | 1.5   | 89.7                                 | 32.6  |      |
| 20140711                                                                            | 91500    | Prešovice | 30µmRR/25Hz/200nn | 14  | 0.0336                              | 0.0036 | 0.0051                              | 0.0001 | 0.2202            | 33.5                                | 7.4   | 32.7                                | 1.6   | 94.7                                 | 20.0  |      |
| 20140711                                                                            | 91500    | Prešovice | 30µmRR/25Hz/200nn | 15  | 0.0345                              | 0.0037 | 0.0051                              | 0.0001 | 0.2342            | 34.4                                | 7.5   | 32.9                                | 1.7   | 145.0                                | 30.1  |      |
| Reference age: 33.0 ± 0.1 Ma (average of SHRIMP and LA-ICP-MS); Iwano et al. (2013) |          |           |                   |     |                                     |        |                                     |        |                   | Weighted mean =                     | 34.1  | 1.9                                 | 32.9  | 0.4                                  | 108.5 | 5.7  |

Note: Dia.: diameter; Rep.: repetition rate; WL.: wavelength, 1SD: 1-standard deviation; 2SD: 2-standard deviation; bold face: weighted average and error; Ma: million years ago

Decay constant used for the age calculations were  $9.8485 \times 10^{-10} \text{ yr}^{-1}$  for <sup>235</sup>U and  $1.55125 \times 10^{-10} \text{ yr}^{-1}$  for <sup>238</sup>U.

Weighted mean was calculated by the following equation:  $\bar{x} \pm \sigma = [\sum (x_i/\sigma_i)^2]^{-1/2} [\sum (1/\sigma_i)^2]^{-1/2} \pm [\sum (1/\sigma_i)^2]^{-1/2}$ .
