# Supplementary material for: An improved U–Pb age dating method for zircon and monazite using 200/266 nm femtosecond laser ablation and enhanced sensitivity multiple-Faraday collector inductively coupled plasma mass spectrometry
Source: Royal Society of Chemistry journal article supplement (doi:10.1039/c4ja00257a), 2014-09-25
Supplement: c4ja00257a2.pdf [file c4ja00257a2.pdf]

**ESI Data Table 2: Analytical results for the U-Pb age of monazite crystals**

| Date                                                                     | Sample     | Conditions       | No.   | $^{207}\text{Pb}/^{235}\text{U}$ | ISD    | $^{206}\text{Pb}/^{238}\text{U}$ | ISD    | Error correlation | $^{207}\text{Pb}/^{235}\text{U}$ | 2SD           | $^{206}\text{Pb}/^{238}\text{U}$ | 2SD           | $^{207}\text{Pb}/^{206}\text{Pb}$ | 2SD           |            |
|--------------------------------------------------------------------------|------------|------------------|-------|----------------------------------|--------|----------------------------------|--------|-------------------|----------------------------------|---------------|----------------------------------|---------------|-----------------------------------|---------------|------------|
|                                                                          |            | Dia./Rep./WL.    | Ratio |                                  | Ratio  |                                  |        |                   | Age (Ma)                         | Age (Ma)      |                                  | Age (Ma)      |                                   |               |            |
| 20140716                                                                 | Thompson   | 30µmRR/5Hz/200nm | 1     | 4.5693                           | 0.2422 | 0.3083                           | 0.0163 | 0.9948            | 1743.7                           | 440.5         | 1732.3                           | 208.0         | 1757.3                            | 18.9          |            |
| 20140716                                                                 | Thompson   | 30µmRR/5Hz/200nm | 2     | 4.6172                           | 0.2088 | 0.3105                           | 0.0139 | 0.9927            | 1752.4                           | 385.1         | 1743.0                           | 178.5         | 1763.6                            | 19.2          |            |
| 20140716                                                                 | Thompson   | 30µmRR/5Hz/200nm | 3     | 4.5555                           | 0.1920 | 0.3060                           | 0.0127 | 0.9880            | 1741.2                           | 356.7         | 1721.0                           | 163.3         | 1765.4                            | 23.0          |            |
| 20140716                                                                 | Thompson   | 30µmRR/5Hz/200nm | 4     | 4.6083                           | 0.2418 | 0.3113                           | 0.0162 | 0.9939            | 1750.8                           | 439.8         | 1746.9                           | 207.6         | 1755.4                            | 20.4          |            |
| 20140716                                                                 | Thompson   | 30µmRR/5Hz/200nm | 5     | 4.6361                           | 0.2471 | 0.3122                           | 0.0165 | 0.9931            | 1755.8                           | 448.4         | 1751.6                           | 211.3         | 1760.7                            | 22.0          |            |
| 20140716                                                                 | Thompson   | 30µmRR/5Hz/200nm | 6     | 4.7277                           | 0.2676 | 0.3171                           | 0.0178 | 0.9945            | 1772.2                           | 481.5         | 1775.4                           | 228.1         | 1768.3                            | 21.0          |            |
| 20140716                                                                 | Thompson   | 30µmRR/5Hz/200nm | 7     | 4.5827                           | 0.1936 | 0.3095                           | 0.0130 | 0.9925            | 1746.1                           | 359.4         | 1738.4                           | 166.3         | 1755.4                            | 18.1          |            |
| 20140716                                                                 | Thompson   | 30µmRR/5Hz/200nm | 8     | 4.5505                           | 0.1963 | 0.3099                           | 0.0133 | 0.9919            | 1740.3                           | 364.0         | 1740.4                           | 169.9         | 1740.1                            | 19.0          |            |
| 20140716                                                                 | Thompson   | 30µmRR/5Hz/200nm | 9     | 4.5862                           | 0.1752 | 0.3118                           | 0.0118 | 0.9891            | 1746.8                           | 327.8         | 1749.5                           | 151.0         | 1743.4                            | 19.6          |            |
| 20140716                                                                 | Thompson   | 30µmRR/5Hz/200nm | 10    | 4.6206                           | 0.2017 | 0.3122                           | 0.0135 | 0.9925            | 1753.0                           | 373.1         | 1751.4                           | 173.2         | 1754.9                            | 18.8          |            |
| <b>Reference age: 1766 Ma (ID-TIMS), Williams et al. (1996)</b>          |            |                  |       |                                  |        |                                  |        |                   | <b>Weighted mean =</b>           | <b>1749.0</b> | <b>123.1</b>                     | <b>1743.5</b> | <b>57.3</b>                       | <b>1755.9</b> | <b>6.3</b> |
| 20140716                                                                 | Thompson   | 30µm/2Hz/266nm   | 1     | 4.7116                           | 0.2166 | 0.3168                           | 0.0145 | 0.9933            | 1769.3                           | 398.1         | 1774.0                           | 185.1         | 1763.7                            | 18.7          |            |
| 20140716                                                                 | Thompson   | 30µm/2Hz/266nm   | 2     | 4.7114                           | 0.1429 | 0.3174                           | 0.0096 | 0.9922            | 1769.3                           | 271.2         | 1777.0                           | 122.6         | 1760.1                            | 13.3          |            |
| 20140716                                                                 | Thompson   | 30µm/2Hz/266nm   | 3     | 4.6581                           | 0.1616 | 0.3138                           | 0.0108 | 0.9914            | 1759.7                           | 304.3         | 1759.6                           | 138.5         | 1759.9                            | 16.0          |            |
| 20140716                                                                 | Thompson   | 30µm/2Hz/266nm   | 4     | 4.6371                           | 0.1407 | 0.3123                           | 0.0094 | 0.9894            | 1756.0                           | 267.4         | 1752.2                           | 120.4         | 1760.5                            | 15.5          |            |
| 20140716                                                                 | Thompson   | 30µm/2Hz/266nm   | 5     | 4.6270                           | 0.1457 | 0.3117                           | 0.0097 | 0.9897            | 1754.1                           | 276.3         | 1749.2                           | 124.7         | 1760.0                            | 15.8          |            |
| 20140716                                                                 | Thompson   | 30µm/2Hz/266nm   | 6     | 4.6355                           | 0.1824 | 0.3124                           | 0.0122 | 0.9943            | 1755.7                           | 340.2         | 1752.4                           | 156.6         | 1759.6                            | 14.8          |            |
| 20140716                                                                 | Thompson   | 30µm/2Hz/266nm   | 7     | 4.7406                           | 0.2665 | 0.3184                           | 0.0178 | 0.9971            | 1774.4                           | 479.8         | 1781.9                           | 228.1         | 1765.6                            | 15.1          |            |
| 20140716                                                                 | Thompson   | 30µm/2Hz/266nm   | 8     | 4.6755                           | 0.2049 | 0.3144                           | 0.0137 | 0.9954            | 1762.9                           | 378.6         | 1762.4                           | 175.7         | 1763.4                            | 14.7          |            |
| 20140716                                                                 | Thompson   | 30µm/2Hz/266nm   | 9     | 4.6118                           | 0.1475 | 0.3102                           | 0.0098 | 0.9915            | 1751.4                           | 279.4         | 1741.9                           | 126.2         | 1762.8                            | 14.7          |            |
| 20140716                                                                 | Thompson   | 30µm/2Hz/266nm   | 10    | 4.6409                           | 0.1543 | 0.3138                           | 0.0103 | 0.9838            | 1756.7                           | 291.3         | 1759.3                           | 131.6         | 1753.5                            | 20.9          |            |
| <b>Reference age: 1766 Ma (ID-TIMS), Williams et al. (1996)</b>          |            |                  |       |                                  |        |                                  |        |                   | <b>Weighted mean =</b>           | <b>1759.5</b> | <b>98.8</b>                      | <b>1758.6</b> | <b>45.0</b>                       | <b>1761.2</b> | <b>4.9</b> |
| 20140716                                                                 | Manangotry | 30µmRR/5Hz/200nm | 1     | 0.7141                           | 0.0314 | 0.0871                           | 0.0038 | 0.9844            | 547.2                            | 62.7          | 538.5                            | 48.5          | 583.3                             | 9.0           |            |
| 20140716                                                                 | Manangotry | 30µmRR/5Hz/200nm | 2     | 0.7367                           | 0.0277 | 0.0901                           | 0.0033 | 0.9714            | 560.5                            | 55.5          | 555.9                            | 42.3          | 579.3                             | 10.4          |            |
| 20140716                                                                 | Manangotry | 30µmRR/5Hz/200nm | 3     | 0.7144                           | 0.0284 | 0.0883                           | 0.0034 | 0.9809            | 547.4                            | 56.9          | 545.3                            | 44.3          | 556.1                             | 8.6           |            |
| 20140716                                                                 | Manangotry | 30µmRR/5Hz/200nm | 4     | 0.7214                           | 0.0306 | 0.0889                           | 0.0037 | 0.9766            | 551.5                            | 61.2          | 548.8                            | 47.3          | 562.5                             | 10.2          |            |
| 20140716                                                                 | Manangotry | 30µmRR/5Hz/200nm | 5     | 0.7199                           | 0.0300 | 0.0887                           | 0.0037 | 0.9890            | 550.6                            | 60.0          | 548.1                            | 47.0          | 561.1                             | 6.9           |            |
| 20140716                                                                 | Manangotry | 30µmRR/5Hz/200nm | 6     | 0.7355                           | 0.0313 | 0.0904                           | 0.0038 | 0.9859            | 559.8                            | 62.7          | 557.8                            | 48.9          | 567.8                             | 8.1           |            |
| 20140716                                                                 | Manangotry | 30µmRR/5Hz/200nm | 7     | 0.7161                           | 0.0379 | 0.0878                           | 0.0046 | 0.9817            | 548.4                            | 75.5          | 542.5                            | 58.6          | 572.6                             | 11.5          |            |
| 20140716                                                                 | Manangotry | 30µmRR/5Hz/200nm | 8     | 0.7184                           | 0.0333 | 0.0873                           | 0.0040 | 0.9848            | 549.7                            | 66.5          | 539.4                            | 51.3          | 592.6                             | 9.6           |            |
| 20140716                                                                 | Manangotry | 30µmRR/5Hz/200nm | 9     | 0.7143                           | 0.0354 | 0.0873                           | 0.0043 | 0.9925            | 547.3                            | 70.6          | 539.3                            | 55.2          | 580.6                             | 7.0           |            |
| 20140716                                                                 | Manangotry | 30µmRR/5Hz/200nm | 10    | 0.7111                           | 0.0392 | 0.0872                           | 0.0048 | 0.9890            | 545.4                            | 78.1          | 539.3                            | 61.2          | 571.0                             | 9.3           |            |
| <b>Reference age: 558 ± 3Ma (LA-MFC-ICP-MS), Horstwood et al. (2003)</b> |            |                  |       |                                  |        |                                  |        |                   | <b>Weighted mean =</b>           | <b>551.4</b>  | <b>20.2</b>                      | <b>546.4</b>  | <b>15.7</b>                       | <b>572.1</b>  | <b>2.8</b> |
| 20140716                                                                 | Manangotry | 30µm/2Hz/266nm   | 1     | 0.4992                           | 0.0184 | 0.0660                           | 0.0021 | 0.8853            | 411.1                            | 37.0          | 411.8                            | 27.7          | 407.5                             | 14.0          |            |
| 20140716                                                                 | Manangotry | 30µm/2Hz/266nm   | 2     | 0.5083                           | 0.0188 | 0.0666                           | 0.0021 | 0.8527            | 417.3                            | 37.8          | 415.7                            | 27.0          | 426.0                             | 16.4          |            |
| 20140716                                                                 | Manangotry | 30µm/2Hz/266nm   | 3     | 0.5119                           | 0.0218 | 0.0666                           | 0.0022 | 0.7662            | 419.7                            | 43.7          | 415.7                            | 28.0          | 442.0                             | 24.2          |            |
| 20140716                                                                 | Manangotry | 30µm/2Hz/266nm   | 4     | 0.5116                           | 0.0189 | 0.0676                           | 0.0020 | 0.8059            | 419.5                            | 38.0          | 421.4                            | 25.9          | 409.1                             | 17.9          |            |
| 20140716                                                                 | Manangotry | 30µm/2Hz/266nm   | 5     | 0.5120                           | 0.0223 | 0.0673                           | 0.0025 | 0.8585            | 419.8                            | 44.9          | 419.7                            | 32.4          | 420.5                             | 18.8          |            |
| 20140716                                                                 | Manangotry | 30µm/2Hz/266nm   | 6     | 0.5088                           | 0.0176 | 0.0677                           | 0.0020 | 0.8430            | 417.6                            | 35.5          | 422.3                            | 25.5          | 392.0                             | 14.6          |            |
| 20140716                                                                 | Manangotry | 30µm/2Hz/266nm   | 7     | 0.5092                           | 0.0162 | 0.0672                           | 0.0019 | 0.8960            | 417.9                            | 32.6          | 419.5                            | 24.7          | 409.3                             | 11.6          |            |
| 20140716                                                                 | Manangotry | 30µm/2Hz/266nm   | 8     | 0.4802                           | 0.0152 | 0.0634                           | 0.0018 | 0.9125            | 398.2                            | 30.7          | 396.4                            | 23.6          | 409.1                             | 10.6          |            |
| 20140716                                                                 | Manangotry | 30µm/2Hz/266nm   | 9     | 0.4814                           | 0.0141 | 0.0628                           | 0.0013 | 0.7323            | 399.0                            | 28.5          | 392.8                            | 17.4          | 435.2                             | 17.4          |            |
| 20140716                                                                 | Manangotry | 30µm/2Hz/266nm   | 10    | 0.4846                           | 0.0142 | 0.0641                           | 0.0017 | 0.9142            | 401.2                            | 28.7          | 400.3                            | 22.2          | 406.7                             | 9.7           |            |
| <b>Reference age: 558 ± 3Ma (LA-MFC-ICP-MS), Horstwood et al. (2003)</b> |            |                  |       |                                  |        |                                  |        |                   | <b>Weighted mean =</b>           | <b>546.5</b>  | <b>16.2</b>                      | <b>537.7</b>  | <b>12.2</b>                       | <b>578.2</b>  | <b>2.5</b> |

Note: Dia.: diameter; Rep.: repetition rate; WL.: wavelength; ISD: 1-standard deviation; 2SD: 2-standard deviation; bold face: weighted average and error; Ma: million years ago

Decay constant used for the age calculations were  $9.8485 \times 10^{-10} \text{ yr}^{-1}$  for  $^{235}\text{U}$  and  $1.55125 \times 10^{-10} \text{ yr}^{-1}$  for  $^{238}\text{U}$ .

Weighted mean was calculated by the following equation:  $x \pm \sigma = [\sum(x_i/\sigma_i)^2]^{-1/2} [\sum (1/\sigma_i^2)]^{-1/2} \pm [\sum (1/\sigma_i^2)]^{-1/2}$ .
